# Supplementary material for: Assessing reliability and accuracy of qPCR, dPCR and ddPCR for estimating mitochondrial DNA copy number in songbird blood and sperm cells
Source: PeerJ. 2025 Apr 11;13:e19278. doi: 10.7717/peerj.19278 (PMC11995889; doi:10.7717/peerj.19278)
Supplement: Supplemental Information 2 [file peerj-13-19278-s002.xlsx]

## Sheet: ReadMe
Supplementary table for Bagdonaitė et al., Assessing reliability and accuracy of qPCR, dPCR and ddPCR for estimating mtDNA copy number in songbird blood and sperm cells
The document contains multiple data sheets
Raw quantification data of biological mtDNA target is provided separately for qPCR, dPCR and ddPCR in Sheets 2-4
Raw quantification data of synthetic DNA target is combined for qPCR, dPCR and ddPCR and provided in Sheet 5
Sheets: DataLBqPCR-LOQ-Klymus; LB_qPCR_synth_gene_dil; LB_dPCR_synth_gene_dil; LB_ddPCR_synth_gene_dil95 contained reformatted and filtered data, used as input for R. Scripts provided in supplementary material directly match the names of the sheets.
Scripts provided in supplementary material directly match the names of the sheets.

## Sheet: qPCR
Cell type	Method	Individual	Replicate	Cq
Sperm	qPCR	1	1	34.98
Sperm	qPCR	1	2	35.88
Sperm	qPCR	1	3	35.18
Sperm	qPCR	2	1	32.14
Sperm	qPCR	2	2	31.38
Sperm	qPCR	2	3	32.14
Sperm	qPCR	3	1	36.55
Sperm	qPCR	3	2	36.62
Sperm	qPCR	3	3	35.65
Sperm	qPCR	4	1	32.41
Sperm	qPCR	4	2	32.08
Sperm	qPCR	4	3	32.22
Sperm	qPCR	5	1	32.19
Sperm	qPCR	5	2	32.16
Sperm	qPCR	5	3	32.42
Sperm	qPCR	6	1	31.37
Sperm	qPCR	6	2	28.18
Sperm	qPCR	6	3	32.63
Sperm	qPCR	7	1	30.8
Sperm	qPCR	7	2	31.05
Sperm	qPCR	7	3	30.64
Sperm	qPCR	8	1	33.94
Sperm	qPCR	8	2	34.28
Sperm	qPCR	8	3	33.67
Sperm	qPCR	9	1	32.31
Sperm	qPCR	9	2	32.34
Sperm	qPCR	9	3	32.06
Sperm	qPCR	10	1	35.98
Sperm	qPCR	10	2	35.88
Sperm	qPCR	10	3	35.89
Blood	qPCR	1	1	37.71
Blood	qPCR	1	2	37.08
Blood	qPCR	1	3	37.47
Blood	qPCR	2	1	36.31
Blood	qPCR	2	2	36.97
Blood	qPCR	2	3	37.5
Blood	qPCR	3	1	36.92
Blood	qPCR	3	2	37.9
Blood	qPCR	3	3	37.95
Blood	qPCR	4	1	38.09
Blood	qPCR	4	2	37.13
Blood	qPCR	4	3	37.63
Blood	qPCR	5	1	37.67
Blood	qPCR	5	2	37.47
Blood	qPCR	5	3	36.97
Blood	qPCR	6	1	38
Blood	qPCR	6	2	37.42
Blood	qPCR	6	3	37.11
Blood	qPCR	7	1	37.19
Blood	qPCR	7	2	37.02
Blood	qPCR	7	3	37.18
Blood	qPCR	8	1	37.99
Blood	qPCR	8	2	37.19
Blood	qPCR	8	3	38.01
Blood	qPCR	9	1	37.93
Blood	qPCR	9	2	38.36
Blood	qPCR	9	3	35.81
Blood	qPCR	10	1	36.69
Blood	qPCR	10	2	36.29
Blood	qPCR	10	3	37.24

## Sheet: dPCR
Cell type	Method	Individual	Replicate	Copies/µL	Accepted Droplets	Positive Droplets	Negative Droplets
Sperm	dPCR	1	1	20.74	8231	58	8173
Sperm	dPCR	1	2	47.41	8271	132	8139
Sperm	dPCR	1	3	52.76	8210	145	8065
Sperm	dPCR	2	1	467.3	7242	1064	6178
Sperm	dPCR	2	2	486.7	7852	1195	6657
Sperm	dPCR	2	3	450.8	8269	1176	7093
Sperm	dPCR	3	1	82.37	7982	222	7760
Sperm	dPCR	3	2	39.32	8051	111	7940
Sperm	dPCR	3	3	22.5	8240	62	8178
Sperm	dPCR	4	1	350.9	8270	905	7365
Sperm	dPCR	4	2	474.4	7637	1096	6541
Sperm	dPCR	4	3	444.1	8273	1116	7157
Sperm	dPCR	5	1	587	8244	1445	6799
Sperm	dPCR	5	2	464.1	8255	1150	7105
Sperm	dPCR	5	3	422.7	8268	1071	7197
Sperm	dPCR	6	1	522	7797	1267	6530
Sperm	dPCR	6	2	460.8	7971	1148	6823
Sperm	dPCR	6	3	621.9	8258	1506	6752
Sperm	dPCR	7	1	304.7	8282	761	7521
Sperm	dPCR	7	2	601.3	8245	1447	6798
Sperm	dPCR	7	3	615.1	6465	1142	5323
Sperm	dPCR	8	1	293.8	7208	645	6563
Sperm	dPCR	8	2	290.9	5915	531	5384
Sperm	dPCR	8	3	222.7	6240	452	5788
Sperm	dPCR	9	1	211	6549	449	6100
Sperm	dPCR	9	2	292.5	7635	676	6959
Sperm	dPCR	9	3	298.9	6255	559	5696
Sperm	dPCR	10	1	46.79	8255	120	8135
Sperm	dPCR	10	2	81.1	8270	202	8068
Sperm	dPCR	10	3	47.78	8267	121	8146
Blood	dPCR	1	1	37.25	8250	97	8153
Blood	dPCR	1	2	13.46	8265	37	8228
Blood	dPCR	1	3	5.8	7698	15	7683
Blood	dPCR	2	1	19.18	8272	50	8222
Blood	dPCR	2	2	40.35	8233	102	8131
Blood	dPCR	2	3	35.28	8276	89	8187
Blood	dPCR	3	1	37.8	8276	95	8181
Blood	dPCR	3	2	17.39	8261	44	8217
Blood	dPCR	3	3	23.46	8260	61	8199
Blood	dPCR	4	1	20.72	8230	57	8173
Blood	dPCR	4	2	7.9	8263	22	8241
Blood	dPCR	4	3	18.19	8227	48	8179
Blood	dPCR	5	1	28.9	8272	75	8197
Blood	dPCR	5	2	28.38	8282	73	8209
Blood	dPCR	5	3	35.08	8273	89	8184
Blood	dPCR	6	1	25.65	8269	65	8204
Blood	dPCR	6	2	28.65	8266	75	8191
Blood	dPCR	6	3	23.8	8071	65	8006
Blood	dPCR	7	1	7.8	8244	22	8222
Blood	dPCR	7	2	16.38	8250	44	8206
Blood	dPCR	7	3	17.44	8260	46	8214
Blood	dPCR	8	1	24.08	8269	62	8207
Blood	dPCR	8	2	29.98	8247	77	8170
Blood	dPCR	8	3	11.49	8272	30	8242
Blood	dPCR	9	1	12.01	8262	32	8230
Blood	dPCR	9	2	12.17	8170	34	8136
Blood	dPCR	9	3	5.057	7470	13	7457
Blood	dPCR	10	1	13.43	8273	37	8236
Blood	dPCR	10	2	35.04	8274	93	8181
Blood	dPCR	10	3	23.22	8191	60	8131
NTC	dPCR		1	0	8214	0	8214
NTC	dPCR		2	0	8266	0	8266
NTC	dPCR		3	0	8261	0	8261
NTC	dPCR		4	0	8188	0	8188

## Sheet: ddPCR
Cell type	Method	Individual	Replicate	Copies/µL	Accepted Droplets	Positive Droplets	Negative Droplets
Sperm	ddPCR	1	1	46.9	17098	668	16430
Sperm	ddPCR	1	2	49.6	15634	646	14988
Sperm	ddPCR	1	3	40.1	15086	506	14580
Sperm	ddPCR	2	1	403	16244	4713	11531
Sperm	ddPCR	2	2	432	15145	4657	10488
Sperm	ddPCR	2	3	401	16854	4867	11987
Sperm	ddPCR	3	1	43	16226	583	15643
Sperm	ddPCR	3	2	42	16185	567	15618
Sperm	ddPCR	3	3	41.8	14902	520	14382
Sperm	ddPCR	4	1	442	16557	5190	11367
Sperm	ddPCR	4	2	334	17275	4268	13007
Sperm	ddPCR	4	3	334	15088	3729	11359
Sperm	ddPCR	5	1	427	15075	4589	10486
Sperm	ddPCR	5	2	420	15320	4597	10723
Sperm	ddPCR	5	3	323	15372	3688	11684
Sperm	ddPCR	6	1	526	15710	5661	10049
Sperm	ddPCR	6	2	487	16875	5723	11152
Sperm	ddPCR	6	3	547	14804	5506	9298
Sperm	ddPCR	7	1	410	15029	4426	10603
Sperm	ddPCR	7	2	422	16652	5023	11629
Sperm	ddPCR	7	3	450	14681	4667	10014
Sperm	ddPCR	8	1	311	15019	3486	11533
Sperm	ddPCR	8	2	354	14932	3880	11052
Sperm	ddPCR	8	3	287	14716	3183	11533
Sperm	ddPCR	9	1	388	17157	4818	12339
Sperm	ddPCR	9	2	382	15685	4350	11335
Sperm	ddPCR	9	3	306	15633	3583	12050
Sperm	ddPCR	10	1	104	16384	1391	14993
Sperm	ddPCR	10	2	101	15705	1295	14410
Sperm	ddPCR	10	3	93.5	15714	1201	14513
Blood	ddPCR	1	1	37.5	16602	521	16081
Blood	ddPCR	1	2	36.6	16437	504	15933
Blood	ddPCR	1	3	39.1	16045	524	15521
Blood	ddPCR	2	1	43.6	15764	573	15191
Blood	ddPCR	2	2	49.3	16238	666	15572
Blood	ddPCR	2	3	47.7	15813	628	15185
Blood	ddPCR	3	1	37.4	16683	522	16161
Blood	ddPCR	3	2	31.5	16215	429	15786
Blood	ddPCR	3	3	36	16114	486	15628
Blood	ddPCR	4	1	29.7	16637	415	16222
Blood	ddPCR	4	2	28	17510	412	17098
Blood	ddPCR	4	3	29.6	16985	422	16563
Blood	ddPCR	5	1	46.4	16331	631	15700
Blood	ddPCR	5	2	38.6	16542	534	16008
Blood	ddPCR	5	3	38.7	17230	557	16673
Blood	ddPCR	6	1	34.1	16303	466	15837
Blood	ddPCR	6	2	33.6	16601	467	16134
Blood	ddPCR	6	3	32.2	16776	453	16323
Blood	ddPCR	7	1	39.3	14991	493	14498
Blood	ddPCR	7	2	34.8	15855	462	15393
Blood	ddPCR	7	3	36.1	16123	487	15636
Blood	ddPCR	8	1	21.4	16562	298	16264
Blood	ddPCR	8	2	22	16848	312	16536
Blood	ddPCR	8	3	24.9	16151	338	15813
Blood	ddPCR	9	1	27.9	16758	393	16365
Blood	ddPCR	9	2	34.3	16104	463	15641
Blood	ddPCR	9	3	28.5	15985	382	15603
Blood	ddPCR	10	1	49.9	16383	680	15703
Blood	ddPCR	10	2	46.7	15323	596	14727
Blood	ddPCR	10	3	48.7	16960	688	16272
NTC	ddPCR			0	17832	0	17832
NTC	ddPCR			0	16545	0	16545
NTC	ddPCR			0	15893	0	15893
NTC	ddPCR			0	17092	0	17092

## Sheet: Synthetic_DNA-ALL
Concentration ng/uL	Replicate	Method	Concentration_Cq	Mean_concentration_Cq	SD	CV%	CV	Total	Positive	Negative	percent_positive	expected_concentration
0.00025	1	ddPCR	10455	406451	510846	125.685	1.25685	14465	14463	2	99.9862	4879513
0.00025	2	ddPCR	1000000					15303	15303	0	100	4879513
0.00025	3	ddPCR	1000000					14443	14443	0	100	4879513
0.00025	4	ddPCR	1000000					14840	14840	0	100	4879513
0.00025	5	ddPCR	11365					15679	15678	1	99.9936	4879513
0.00025	6	ddPCR	10546					15634	15632	2	99.9872	4879513
0.00025	7	ddPCR	1000000					18135	18135	0	100	4879513
0.00025	8	ddPCR	11347					15445	15444	1	99.9935	4879513
0.00025	9	ddPCR	10177					17139	17136	3	99.9825	4879513
0.00025	10	ddPCR	10619					16641	16639	2	99.988	4879513
2.5e-05	1	ddPCR	8099	7956.6	1465	18.4124	0.184124	18563	18544	19	99.8976	487951
2.5e-05	2	ddPCR	8483					18944	18930	14	99.9261	487951
2.5e-05	3	ddPCR	8938					15944	15936	8	99.9498	487951
2.5e-05	4	ddPCR	8120					15913	15897	16	99.8995	487951
2.5e-05	5	ddPCR	9293					18859	18852	7	99.9629	487951
2.5e-05	6	ddPCR	8034					16637	16619	18	99.8918	487951
2.5e-05	7	ddPCR	3964					13137	12685	452	96.5593	487951
2.5e-05	8	ddPCR	8470					14724	14713	11	99.9253	487951
2.5e-05	9	ddPCR	8062					16093	16076	17	99.8944	487951
2.5e-05	10	ddPCR	8103					16661	16644	17	99.898	487951
2.5e-06	1	ddPCR	662	543.1	251.224	46.2575	0.462575	17324	7451	9873	43.0097	48795.1
2.5e-06	2	ddPCR	701					14736	6616	8120	44.8969	48795.1
2.5e-06	3	ddPCR	637					14216	5941	8275	41.7909	48795.1
2.5e-06	4	ddPCR	824					17841	8982	8859	50.3447	48795.1
2.5e-06	5	ddPCR	753					14590	6900	7690	47.2927	48795.1
2.5e-06	6	ddPCR	705					13451	6061	7390	45.0598	48795.1
2.5e-06	7	ddPCR	573					14219	5480	8739	38.54	48795.1
2.5e-06	8	ddPCR	205					15268	2444	12824	16.0073	48795.1
2.5e-06	9	ddPCR	186					16074	2348	13726	14.6074	48795.1
2.5e-06	10	ddPCR	185					17372	2533	14839	14.5809	48795.1
2.5e-07	1	ddPCR	96.7	77.85	16.8761	21.6777	0.216777	1470	116	1354	7.89116	4879.51
2.5e-07	2	ddPCR	74.2					17727	1084	16643	6.11497	4879.51
2.5e-07	3	ddPCR	86.3					16380	1158	15222	7.0696	4879.51
2.5e-07	4	ddPCR	86.4					17082	1210	15872	7.08348	4879.51
2.5e-07	5	ddPCR	84.6					17314	1201	16113	6.93658	4879.51
2.5e-07	6	ddPCR	35.9					9581	288	9293	3.00595	4879.51
2.5e-07	7	ddPCR	73.7					18090	1099	16991	6.07518	4879.51
2.5e-07	8	ddPCR	68.4					18139	1025	17114	5.65081	4879.51
2.5e-07	9	ddPCR	85.7					16759	1177	15582	7.02309	4879.51
2.5e-07	10	ddPCR	86.6					15959	1132	14827	7.09318	4879.51
2.5e-08	1	ddPCR	11.2	9.728	1.83968	18.9112	0.189112	17188	163	17025	0.948336	487.951
2.5e-08	2	ddPCR	8.71					16548	122	16426	0.737249	487.951
2.5e-08	3	ddPCR	9.25					17104	134	16970	0.783442	487.951
2.5e-08	4	ddPCR	8.71					16816	124	16692	0.737393	487.951
2.5e-08	5	ddPCR	9.93					19505	164	19341	0.84081	487.951
2.5e-08	6	ddPCR	14					16814	199	16615	1.18354	487.951
2.5e-08	7	ddPCR	8.94					14136	107	14029	0.756933	487.951
2.5e-08	8	ddPCR	10.5					18646	165	18481	0.884908	487.951
2.5e-08	9	ddPCR	7.45					16639	105	16534	0.631048	487.951
2.5e-08	10	ddPCR	8.59					17877	130	17747	0.727191	487.951
2.5e-09	1	ddPCR	0.857	2.0218	2.41587	119.491	1.19491	15108	11	15097	0.0728091	48.7951
2.5e-09	2	ddPCR	0.52					15829	7	15822	0.0442226	48.7951
2.5e-09	3	ddPCR	1.54					16818	22	16796	0.130812	48.7951
2.5e-09	4	ddPCR	1.2					14707	15	14692	0.101992	48.7951
2.5e-09	5	ddPCR	8.07					16827	115	16712	0.683425	48.7951
2.5e-09	6	ddPCR	4.48					17092	65	17027	0.380295	48.7951
2.5e-09	7	ddPCR	0.719					16363	10	16353	0.0611135	48.7951
2.5e-09	8	ddPCR	0.624					16974	9	16965	0.0530223	48.7951
2.5e-09	9	ddPCR	0.948					16140	13	16127	0.0805452	48.7951
2.5e-09	10	ddPCR	1.26					18739	20	18719	0.106729	48.7951
2.5e-10	1	ddPCR	0.264	0.9904	1.60376	161.931	1.61931	17828	4	17824	0.0224366	4.87951
2.5e-10	2	ddPCR	0.473					17407	7	17400	0.0402137	4.87951
2.5e-10	3	ddPCR	2.88					15955	39	15916	0.244437	4.87951
2.5e-10	4	ddPCR	4.9					16858	70	16788	0.415233	4.87951
2.5e-10	5	ddPCR	0.138					17070	2	17068	0.0117165	4.87951
2.5e-10	6	ddPCR	0.138					17059	2	17057	0.011724	4.87951
2.5e-10	7	ddPCR	0.368					15974	5	15969	0.0313009	4.87951
2.5e-10	8	ddPCR	0.22					16015	3	16012	0.0187324	4.87951
2.5e-10	9	ddPCR	0.283					16617	4	16613	0.0240717	4.87951
2.5e-10	10	ddPCR	0.24					19636	4	19632	0.0203707	4.87951
2.5e-11	1	ddPCR	0.463	0.418	0.354713	84.8597	0.848597	17806	7	17799	0.0393126	0.487951
2.5e-11	2	ddPCR	0.139					16964	2	16962	0.0117897	0.487951
2.5e-11	3	ddPCR	0.2					17661	3	17658	0.0169866	0.487951
2.5e-11	4	ddPCR	0.135					17433	2	17431	0.0114725	0.487951
2.5e-11	5	ddPCR	0.064					18391	1	18390	0.00543744	0.487951
2.5e-11	6	ddPCR	0.37					15898	5	15893	0.0314505	0.487951
2.5e-11	7	ddPCR	0.251					9378	2	9376	0.0213265	0.487951
2.5e-11	8	ddPCR	0.679					19067	11	19056	0.0576913	0.487951
2.5e-11	9	ddPCR	1.22					15438	16	15422	0.10364	0.487951
2.5e-11	10	ddPCR	0.659					17850	10	17840	0.0560224	0.487951
2.5e-12	1	ddPCR	0.071	0.18622	0.179053	96.1512	0.961512	16574	1	16573	0.00603355	0.0487951
2.5e-12	2	ddPCR	0.212					16635	3	16632	0.0180343	0.0487951
2.5e-12	3	ddPCR	0.0721					16307	1	16306	0.00613234	0.0487951
2.5e-12	4	ddPCR	0.607					15521	8	15513	0.0515431	0.0487951
2.5e-12	5	ddPCR	0.0714					16472	1	16471	0.00607091	0.0487951
2.5e-12	6	ddPCR	0					16580	0	16580	0	0.0487951
2.5e-12	7	ddPCR	0.258					13700	3	13697	0.0218978	0.0487951
2.5e-12	8	ddPCR	0.16					14698	2	14696	0.0136073	0.0487951
2.5e-12	9	ddPCR	0.328					14336	4	14332	0.0279018	0.0487951
2.5e-12	10	ddPCR	0.0827					14224	1	14223	0.00703037	0.0487951
NTC	1	ddPCR	0.156					15038	2	15036	0.0132996
NTC	2	ddPCR	0.161					14632	2	14630	0.0136687
NTC	3	ddPCR	0.0799					14726	1	14725	0.00679071
NTC	4	ddPCR	3.07					11505	30	11475	0.260756
0.00025	1	dPCR	22363.4	21435.2	7921.12	36.9539	0.369539	8183	8179	4	99.9511	4879513
0.00025	2	dPCR	23108.1					8261	8257	4	99.9516	4879513
0.00025	3	dPCR	NA					8259	8259	0	100	4879513
0.00025	4	dPCR	26708.2					8266	8265	1	99.9879	4879513
0.00025	5	dPCR	17412.8					8206	8184	22	99.7319	4879513
0.00025	6	dPCR	24553.7					8291	8289	2	99.9759	4879513
0.00025	7	dPCR	26502.8					8259	8258	1	99.9879	4879513
0.00025	8	dPCR	20204.5					8086	8078	8	99.9011	4879513
0.00025	9	dPCR	14005.1					7448	7395	53	99.2884	4879513
0.00025	10	dPCR	18057.8					5153	5141	12	99.7671	4879513
2.5e-05	1	dPCR	22691.6	9667.03	4815.26	49.8112	0.498112	8263	8258	5	99.9395	487951
2.5e-05	2	dPCR	7968.9					8270	7629	641	92.2491	487951
2.5e-05	3	dPCR	5509.4					8264	6895	1369	83.4342	487951
2.5e-05	4	dPCR	8459.2					8263	7749	514	93.7795	487951
2.5e-05	5	dPCR	6340.1					8269	7204	1065	87.1206	487951
2.5e-05	6	dPCR	9222					8272	7871	401	95.1523	487951
2.5e-05	7	dPCR	9606.4					8234	7919	315	96.1744	487951
2.5e-05	8	dPCR	10387					5827	5652	175	96.9967	487951
2.5e-05	9	dPCR	9128.2					8277	7846	431	94.7928	487951
2.5e-05	10	dPCR	7357.5					8273	7466	807	90.2454	487951
2.5e-06	1	dPCR	1308.1	1247.2	223.101	17.8881	0.178881	7854	2659	5195	33.8554	48795.1
2.5e-06	2	dPCR	715.2					8236	1631	6605	19.8033	48795.1
2.5e-06	3	dPCR	1247.6					8159	2679	5480	32.8349	48795.1
2.5e-06	4	dPCR	1479.6					8215	3124	5091	38.028	48795.1
2.5e-06	5	dPCR	1431.6					8112	3109	5003	38.3259	48795.1
2.5e-06	6	dPCR	1371.9					7740	2863	4877	36.9897	48795.1
2.5e-06	7	dPCR	1155.3					8216	2519	5697	30.6597	48795.1
2.5e-06	8	dPCR	1207.6					8203	2583	5620	31.4885	48795.1
2.5e-06	9	dPCR	1428.9					8221	2964	5257	36.054	48795.1
2.5e-06	10	dPCR	1126.2					8195	2382	5813	29.0665	48795.1
2.5e-07	1	dPCR	112.4	89.656	21.4818	23.9603	0.239603	8250	294	7956	3.56364	4879.51
2.5e-07	2	dPCR	98.39					8248	268	7980	3.24927	4879.51
2.5e-07	3	dPCR	117.7					8258	325	7933	3.93558	4879.51
2.5e-07	4	dPCR	106.7					8253	291	7962	3.52599	4879.51
2.5e-07	5	dPCR	101.2					8272	261	8011	3.15522	4879.51
2.5e-07	6	dPCR	70.56					8264	179	8085	2.16602	4879.51
2.5e-07	7	dPCR	48.63					8267	123	8144	1.48784	4879.51
2.5e-07	8	dPCR	77.54					8264	192	8072	2.32333	4879.51
2.5e-07	9	dPCR	85.52					5754	148	5606	2.57212	4879.51
2.5e-07	10	dPCR	77.92					8216	201	8015	2.44645	4879.51
2.5e-08	1	dPCR	16.59	10.3	4.31856	41.9277	0.419277	8278	46	8232	0.55569	487.951
2.5e-08	2	dPCR	10.04					8247	26	8221	0.315266	487.951
2.5e-08	3	dPCR	6.492					8277	17	8260	0.205388	487.951
2.5e-08	4	dPCR	6.314					8273	16	8257	0.1934	487.951
2.5e-08	5	dPCR	7.544					8275	19	8256	0.229607	487.951
2.5e-08	6	dPCR	9.37					8213	23	8190	0.280044	487.951
2.5e-08	7	dPCR	5.44					7786	13	7773	0.166966	487.951
2.5e-08	8	dPCR	18.14					8243	47	8196	0.570181	487.951
2.5e-08	9	dPCR	12.32					8258	34	8224	0.411722	487.951
2.5e-08	10	dPCR	10.75					8019	29	7990	0.361641	487.951
2.5e-09	1	dPCR	0.793	0.8138	0.422788	51.9524	0.519524	8275	2	8273	0.0241692	48.7951
2.5e-09	2	dPCR	0.789					8277	2	8275	0.0241633	48.7951
2.5e-09	3	dPCR	0.396					8276	1	8275	0.0120831	48.7951
2.5e-09	4	dPCR	0.399					8228	1	8227	0.0121536	48.7951
2.5e-09	5	dPCR	1.194					8249	3	8246	0.036368	48.7951
2.5e-09	6	dPCR	1.524					8269	4	8265	0.0483734	48.7951
2.5e-09	7	dPCR	0.363					8263	1	8262	0.0121021	48.7951
2.5e-09	8	dPCR	1.103					8024	3	8021	0.0373878	48.7951
2.5e-09	9	dPCR	0.386					8197	1	8196	0.0121996	48.7951
2.5e-09	10	dPCR	1.191					8153	3	8150	0.0367963	48.7951
2.5e-10	1	dPCR	0.397	0.1511	0.259539	171.766	1.71766	8256	1	8255	0.0121124	4.87951
2.5e-10	2	dPCR	0					8268	0	8268	0	4.87951
2.5e-10	3	dPCR	0					8263	0	8263	0	4.87951
2.5e-10	4	dPCR	0					8266	0	8266	0	4.87951
2.5e-10	5	dPCR	0.725					8229	2	8227	0.0243043	4.87951
2.5e-10	6	dPCR	0					8264	0	8264	0	4.87951
2.5e-10	7	dPCR	0					8255	0	8255	0	4.87951
2.5e-10	8	dPCR	0					7133	0	7133	0	4.87951
2.5e-10	9	dPCR	0.389					8235	1	8234	0.0121433	4.87951
2.5e-10	10	dPCR	0					8275	0	8275	0	4.87951
2.5e-11	1	dPCR	0.762	0.1116	0.254168	227.75	2.2775	8250	2	8248	0.0242424	0.487951
2.5e-11	2	dPCR	0.354					8250	1	8249	0.0121212	0.487951
2.5e-11	3	dPCR	0					8252	0	8252	0	0.487951
2.5e-11	4	dPCR	0					8271	0	8271	0	0.487951
2.5e-11	5	dPCR	0					8264	0	8264	0	0.487951
2.5e-11	6	dPCR	0					8248	0	8248	0	0.487951
2.5e-11	7	dPCR	0					8250	0	8250	0	0.487951
2.5e-11	8	dPCR	0					8243	0	8243	0	0.487951
2.5e-11	9	dPCR	0					8254	0	8254	0	0.487951
2.5e-11	10	dPCR	0					8263	0	8263	0	0.487951
2.5e-12	1	dPCR	0.703	0.5371	1.34016	249.518	2.49518	8260	2	8258	0.0242131	0.0487951
2.5e-12	2	dPCR	0					7606	0	7606	0	0.0487951
2.5e-12	3	dPCR	0					8270	0	8270	0	0.0487951
2.5e-12	4	dPCR	0					8270	0	8270	0	0.0487951
2.5e-12	5	dPCR	0					8263	0	8263	0	0.0487951
2.5e-12	6	dPCR	0					8273	0	8273	0	0.0487951
2.5e-12	7	dPCR	0.377					8264	1	8263	0.0121007	0.0487951
2.5e-12	8	dPCR	0					8261	0	8261	0	0.0487951
2.5e-12	9	dPCR	0					6949	0	6949	0	0.0487951
2.5e-12	10	dPCR	4.291					6682	10	6672	0.149656	0.0487951
NTC	1	dPCR	0	7.7286	9.90019	128.098	1.28098	8262	0	8262	0
NTC	2	dPCR	0					8254	0	8254	0
NTC	3	dPCR	0					8261	0	8261	0
NTC	4	dPCR	0					8270	0	8270	0
NTC	5	dPCR	0					8262	0	8262	0
NTC	6	dPCR	0.366					7793	1	7792	0.012832
0.00025	1	qPCR	19.16	19.254	0.206516	1.07259	0.0107259
0.00025	2	qPCR	18.98
0.00025	3	qPCR	19.31
0.00025	4	qPCR	19.47
0.00025	5	qPCR	19.2
0.00025	6	qPCR	19.32
0.00025	7	qPCR	18.94
0.00025	8	qPCR	19.34
0.00025	9	qPCR	19.2
0.00025	10	qPCR	19.62
2.5e-05	1	qPCR	23.25	23.206	0.139936	0.603019	0.00603019
2.5e-05	2	qPCR	23.42
2.5e-05	3	qPCR	23.18
2.5e-05	4	qPCR	23.25
2.5e-05	5	qPCR	23.29
2.5e-05	6	qPCR	23.37
2.5e-05	7	qPCR	23.03
2.5e-05	8	qPCR	23.11
2.5e-05	9	qPCR	22.98
2.5e-05	10	qPCR	23.18
2.5e-06	1	qPCR	26.21	26.375	0.238386	0.903832	0.00903832
2.5e-06	2	qPCR	26.81
2.5e-06	3	qPCR	26.34
2.5e-06	4	qPCR	26.52
2.5e-06	5	qPCR	26.22
2.5e-06	6	qPCR	26.09
2.5e-06	7	qPCR	26.46
2.5e-06	8	qPCR	26.67
2.5e-06	9	qPCR	26.11
2.5e-06	10	qPCR	26.32
2.5e-07	1	qPCR	30.47	30.487	0.223112	0.731826	0.00731826
2.5e-07	2	qPCR	30.94
2.5e-07	3	qPCR	30.5
2.5e-07	4	qPCR	30.54
2.5e-07	5	qPCR	30.27
2.5e-07	6	qPCR	30.65
2.5e-07	7	qPCR	30.3
2.5e-07	8	qPCR	30.15
2.5e-07	9	qPCR	30.44
2.5e-07	10	qPCR	30.61
2.5e-08	1	qPCR	34.07	34.14	0.134247	0.393225	0.00393225
2.5e-08	2	qPCR	34.06
2.5e-08	3	qPCR	34.23
2.5e-08	4	qPCR	34.33
2.5e-08	5	qPCR	34.1
2.5e-08	6	qPCR	34.01
2.5e-08	7	qPCR	34.05
2.5e-08	8	qPCR	34.12
2.5e-08	9	qPCR	34.03
2.5e-08	10	qPCR	34.4
2.5e-09	1	qPCR	38.42	37.864	0.429682	1.1348	0.011348
2.5e-09	2	qPCR	38.15
2.5e-09	3	qPCR	37.38
2.5e-09	4	qPCR	37.42
2.5e-09	5	qPCR	37.78
2.5e-09	6	qPCR	38.16
2.5e-09	7	qPCR	37.57
2.5e-09	8	qPCR	38.42
2.5e-09	9	qPCR	37.3
2.5e-09	10	qPCR	38.04
2.5e-10	1	qPCR	NA
2.5e-10	2	qPCR	NA
2.5e-10	3	qPCR	NA
2.5e-10	4	qPCR	NA
2.5e-10	5	qPCR	NA
2.5e-10	6	qPCR	NA
2.5e-10	7	qPCR	NA
2.5e-10	8	qPCR	NA
2.5e-10	9	qPCR	NA
2.5e-10	10	qPCR	NA
2.5e-11	1	qPCR	NA
2.5e-11	2	qPCR	NA
2.5e-11	3	qPCR	NA
2.5e-11	4	qPCR	NA
2.5e-11	5	qPCR	NA
2.5e-11	6	qPCR	NA
2.5e-11	7	qPCR	NA
2.5e-11	8	qPCR	NA
2.5e-11	9	qPCR	NA
2.5e-11	10	qPCR	NA
2.5e-12	1	qPCR	NA
2.5e-12	2	qPCR	39.4
2.5e-12	3	qPCR	NA
2.5e-12	4	qPCR	39.96
2.5e-12	5	qPCR	39.91
2.5e-12	6	qPCR	NA
2.5e-12	7	qPCR	NA
2.5e-12	8	qPCR	NA
2.5e-12	9	qPCR	NA
2.5e-12	10	qPCR	NA
NTC	1	qPCR	39.29
NTC	2	qPCR	NA
NTC	3	qPCR	39.9
NTC	4	qPCR	NA

## Sheet: 02_real_DNA_methods-transformed
DNA_type	individual	Method	Mean_conc	SD	CV	CV_%
Sperm	1	dPCR	40.3	17.15	0.4256	42.56
Sperm	2	dPCR	468.27	17.97	0.0384	3.84
Sperm	3	dPCR	48.06	30.88	0.6424	64.24
Sperm	4	dPCR	423.13	64.36	0.1521	15.21
Sperm	5	dPCR	491.27	85.45	0.1739	17.39
Sperm	6	dPCR	534.9	81.32	0.152	15.2
Sperm	7	dPCR	507.03	175.36	0.3459	34.59
Sperm	8	dPCR	269.13	40.24	0.1495	14.95
Sperm	9	dPCR	267.47	49.01	0.1832	18.32
Sperm	10	dPCR	58.56	19.53	0.3335	33.35
Muscle	1	dPCR	18028.9	2031.63	0.1127	11.27
Muscle	2	dPCR	10777.5	3095.5	0.2872	28.72
Muscle	3	dPCR	15571	3260.65	0.2094	20.94
Muscle	4	dPCR	13626.9	462.24	0.0339	3.39
Muscle	5	dPCR	11950.1	1391.13	0.1164	11.64
Muscle	6	dPCR	12704.7	3713.59	0.2923	29.23
Muscle	7	dPCR	14366.4	2250.55	0.1567	15.67
Muscle	8	dPCR	8239.7	1882.18	0.2284	22.84
Blood	1	dPCR	18.82	16.42	0.8724	87.24
Blood	2	dPCR	31.6	11.05	0.3498	34.98
Blood	3	dPCR	26.22	10.48	0.3998	39.98
Blood	4	dPCR	15.61	6.77	0.4339	43.39
Blood	5	dPCR	30.79	3.73	0.1211	12.11
Blood	6	dPCR	26.03	2.45	0.094	9.4
Blood	7	dPCR	13.87	5.29	0.3811	38.11
Blood	8	dPCR	21.85	9.44	0.4322	43.22
Blood	9	dPCR	9.75	4.06	0.4167	41.67
Blood	10	dPCR	23.9	10.82	0.4528	45.28
Sperm	1	qPCR	69.3	20.6	0.2972	29.72
Sperm	2	qPCR	755.43	245.58	0.3251	32.51
Sperm	3	qPCR	37.16	14.96	0.4025	40.25
Sperm	4	qPCR	578.03	65.46	0.1132	11.32
Sperm	5	qPCR	567.57	54.07	0.0953	9.53
Sperm	6	qPCR	740.8	428.79	0.5788	57.88
Sperm	7	qPCR	1523.67	212.66	0.1396	13.96
Sperm	8	qPCR	176.8	36.25	0.205	20.5
Sperm	9	qPCR	577.3	63.35	0.1097	10.97
Sperm	10	qPCR	45.21	1.73	0.0383	3.83
Muscle	1	qPCR	166633	47942.6	0.2877	28.77
Muscle	2	qPCR	49873.3	5920.1	0.1187	11.87
Muscle	3	qPCR	183700	34336.7	0.1869	18.69
Muscle	4	qPCR	155000	28389.4	0.1832	18.32
Muscle	5	qPCR	67080	14092.2	0.2101	21.01
Muscle	6	qPCR	72243.3	12943.5	0.1792	17.92
Muscle	7	qPCR	110693	38979.5	0.3521	35.21
Muscle	8	qPCR	40276.7	6316.44	0.1568	15.68
Blood	1	qPCR	16.33	3.65	0.2236	22.36
Blood	2	qPCR	23.84	9.84	0.4129	41.29
Blood	3	qPCR	15.06	6.5	0.4317	43.17
Blood	4	qPCR	14.55	4.82	0.3316	33.16
Blood	5	qPCR	16.9	4.33	0.2563	25.63
Blood	6	qPCR	15.62	4.63	0.2965	29.65
Blood	7	qPCR	19.69	1.36	0.0692	6.92
Blood	8	qPCR	13.46	4.65	0.3452	34.52
Blood	9	qPCR	9.86	2.03	0.2061	20.61
Blood	10	qPCR	26.54	8.45	0.3184	31.84
Sperm	1	ddPCR	45.53	4.9	0.1075	10.75
Sperm	2	ddPCR	412	17.35	0.0421	4.21
Sperm	3	ddPCR	42.27	0.64	0.0152	1.52
Sperm	4	ddPCR	370	62.35	0.1685	16.85
Sperm	5	ddPCR	390	58.13	0.149	14.9
Sperm	6	ddPCR	520	30.45	0.0586	5.86
Sperm	7	ddPCR	427.33	20.53	0.048	4.8
Sperm	8	ddPCR	317.33	33.95	0.107	10.7
Sperm	9	ddPCR	358.67	45.71	0.1274	12.74
Sperm	10	ddPCR	99.5	5.41	0.0544	5.44
Muscle	1	ddPCR	10867.5	904.39	0.0832	8.32
Muscle	2	ddPCR	8606	285.68	0.0332	3.32
Muscle	3	ddPCR				0
Muscle	4	ddPCR	11418	15.56	0.0014	0.14
Muscle	5	ddPCR	8681	495.36	0.0571	5.71
Muscle	6	ddPCR	11359	65.76	0.0058	0.58
Muscle	7	ddPCR	9826.5	328.24	0.0334	3.34
Muscle	8	ddPCR	6849.5	139.44	0.0204	2.04
Blood	1	ddPCR	37.73	1.27	0.0336	3.36
Blood	2	ddPCR	46.87	2.94	0.0627	6.27
Blood	3	ddPCR	34.97	3.08	0.0882	8.82
Blood	4	ddPCR	29.1	0.95	0.0328	3.28
Blood	5	ddPCR	41.23	4.47	0.1085	10.85
Blood	6	ddPCR	33.3	0.98	0.0296	2.96
Blood	7	ddPCR	36.73	2.32	0.063	6.3
Blood	8	ddPCR	22.77	1.87	0.0822	8.22
Blood	9	ddPCR	30.23	3.53	0.1169	11.69
Blood	10	ddPCR	48.43	1.62	0.0334	3.34

## Sheet: DataLBqPCR-LOQ-Klymus
Well	Fluor	Sample	Cq	SQ	Target
A01	GREEN	NTC	NA	NA	qPCRSC
A02	GREEN	NTC	NA	NA	qPCRSC
A03	GREEN	NTC	39.9	NA	qPCRSC
A04	GREEN	NTC	39.29	NA	qPCRSC
A05	GREEN	_Synth_2.50E-04	19.16	4879513	qPCRSC
A06	GREEN	_Synth_2.50E-04	18.98	4879513	qPCRSC
A07	GREEN	_Synth_2.50E-04	19.31	4879513	qPCRSC
A08	GREEN	_Synth_2.50E-04	19.47	4879513	qPCRSC
A09	GREEN	_Synth_2.50E-04	19.2	4879513	qPCRSC
A10	GREEN	_Synth_2.50E-04	19.32	4879513	qPCRSC
A11	GREEN	_Synth_2.50E-04	18.94	4879513	qPCRSC
A12	GREEN	_Synth_2.50E-04	19.34	4879513	qPCRSC
B01	GREEN	_Synth_2.50E-04	19.2	4879513	qPCRSC
B02	GREEN	_Synth_2.50E-04	19.62	4879513	qPCRSC
B03	GREEN	_Synth_2.50E-05	23.25	487951	qPCRSC
B04	GREEN	_Synth_2.50E-05	23.42	487951	qPCRSC
B05	GREEN	_Synth_2.50E-05	23.18	487951	qPCRSC
B06	GREEN	_Synth_2.50E-05	23.25	487951	qPCRSC
B07	GREEN	_Synth_2.50E-05	23.29	487951	qPCRSC
B08	GREEN	_Synth_2.50E-05	23.37	487951	qPCRSC
B09	GREEN	_Synth_2.50E-05	23.03	487951	qPCRSC
B10	GREEN	_Synth_2.50E-05	23.11	487951	qPCRSC
B11	GREEN	_Synth_2.50E-05	22.98	487951	qPCRSC
B12	GREEN	_Synth_2.50E-05	23.18	487951	qPCRSC
C01	GREEN	_Synth_2.50E-06	26.21	48795.1	qPCRSC
C02	GREEN	_Synth_2.50E-06	26.81	48795.1	qPCRSC
C03	GREEN	_Synth_2.50E-06	26.34	48795.1	qPCRSC
C04	GREEN	_Synth_2.50E-06	26.52	48795.1	qPCRSC
C05	GREEN	_Synth_2.50E-06	26.22	48795.1	qPCRSC
C06	GREEN	_Synth_2.50E-06	26.09	48795.1	qPCRSC
C07	GREEN	_Synth_2.50E-06	26.46	48795.1	qPCRSC
C08	GREEN	_Synth_2.50E-06	26.67	48795.1	qPCRSC
C09	GREEN	_Synth_2.50E-06	26.11	48795.1	qPCRSC
C10	GREEN	_Synth_2.50E-06	26.32	48795.1	qPCRSC
C11	GREEN	_Synth_2.50E-07	30.47	4879.51	qPCRSC
C12	GREEN	_Synth_2.50E-07	30.94	4879.51	qPCRSC
D01	GREEN	_Synth_2.50E-07	30.5	4879.51	qPCRSC
D02	GREEN	_Synth_2.50E-07	30.54	4879.51	qPCRSC
D03	GREEN	_Synth_2.50E-07	30.27	4879.51	qPCRSC
D04	GREEN	_Synth_2.50E-07	30.65	4879.51	qPCRSC
D05	GREEN	_Synth_2.50E-07	30.3	4879.51	qPCRSC
D06	GREEN	_Synth_2.50E-07	30.15	4879.51	qPCRSC
D07	GREEN	_Synth_2.50E-07	30.44	4879.51	qPCRSC
D08	GREEN	_Synth_2.50E-07	30.61	4879.51	qPCRSC
D09	GREEN	_Synth_2.50E-08	34.07	487.951	qPCRSC
D10	GREEN	_Synth_2.50E-08	34.06	487.951	qPCRSC
D11	GREEN	_Synth_2.50E-08	34.23	487.951	qPCRSC
D12	GREEN	_Synth_2.50E-08	34.33	487.951	qPCRSC
E01	GREEN	_Synth_2.50E-08	34.1	487.951	qPCRSC
E02	GREEN	_Synth_2.50E-08	34.01	487.951	qPCRSC
E03	GREEN	_Synth_2.50E-08	34.05	487.951	qPCRSC
E04	GREEN	_Synth_2.50E-08	34.12	487.951	qPCRSC
E05	GREEN	_Synth_2.50E-08	34.03	487.951	qPCRSC
E06	GREEN	_Synth_2.50E-08	34.4	487.951	qPCRSC
E07	GREEN	_Synth_2.5E-09	38.42	48.7951	qPCRSC
E08	GREEN	_Synth_2.5E-09	38.15	48.7951	qPCRSC
E09	GREEN	_Synth_2.5E-09	37.38	48.7951	qPCRSC
E10	GREEN	_Synth_2.5E-09	37.42	48.7951	qPCRSC
E11	GREEN	_Synth_2.5E-09	37.78	48.7951	qPCRSC
E12	GREEN	_Synth_2.5E-09	38.16	48.7951	qPCRSC
F01	GREEN	_Synth_2.5E-09	37.57	48.7951	qPCRSC
F02	GREEN	_Synth_2.5E-09	38.42	48.7951	qPCRSC
F03	GREEN	_Synth_2.5E-09	37.3	48.7951	qPCRSC
F04	GREEN	_Synth_2.5E-09	38.04	48.7951	qPCRSC
F05	GREEN	_Synth_2.5E-10	NA	4.87951	qPCRSC
F06	GREEN	_Synth_2.5E-10	NA	4.87951	qPCRSC
F07	GREEN	_Synth_2.5E-10	NA	4.87951	qPCRSC
F08	GREEN	_Synth_2.5E-10	NA	4.87951	qPCRSC
F09	GREEN	_Synth_2.5E-10	NA	4.87951	qPCRSC
F10	GREEN	_Synth_2.5E-10	NA	4.87951	qPCRSC
F11	GREEN	_Synth_2.5E-10	NA	4.87951	qPCRSC
F12	GREEN	_Synth_2.5E-10	NA	4.87951	qPCRSC
F13	GREEN	_Synth_2.5E-10	NA	4.87951	qPCRSC
F14	GREEN	_Synth_2.5E-10	NA	4.87951	qPCRSC
F15	GREEN	_Synth_2.5E-11	NA	0.487951	qPCRSC
F16	GREEN	_Synth_2.5E-11	NA	0.487951	qPCRSC
F17	GREEN	_Synth_2.5E-11	NA	0.487951	qPCRSC
F18	GREEN	_Synth_2.5E-11	NA	0.487951	qPCRSC
F19	GREEN	_Synth_2.5E-11	NA	0.487951	qPCRSC
F20	GREEN	_Synth_2.5E-11	NA	0.487951	qPCRSC
F21	GREEN	_Synth_2.5E-11	NA	0.487951	qPCRSC
F22	GREEN	_Synth_2.5E-11	NA	0.487951	qPCRSC
F23	GREEN	_Synth_2.5E-11	NA	0.487951	qPCRSC
F24	GREEN	_Synth_2.5E-11	NA	0.487951	qPCRSC
F25	GREEN	_Synth_2.5E-12	NA	0.0487951	qPCRSC
F26	GREEN	_Synth_2.5E-12	39.4	0.0487951	qPCRSC
F27	GREEN	_Synth_2.5E-12	NA	0.0487951	qPCRSC
F28	GREEN	_Synth_2.5E-12	39.96	0.0487951	qPCRSC
F29	GREEN	_Synth_2.5E-12	39.91	0.0487951	qPCRSC
F30	GREEN	_Synth_2.5E-12	NA	0.0487951	qPCRSC
F31	GREEN	_Synth_2.5E-12	NA	0.0487951	qPCRSC
F32	GREEN	_Synth_2.5E-12	NA	0.0487951	qPCRSC
F33	GREEN	_Synth_2.5E-12	NA	0.0487951	qPCRSC
F34	GREEN	_Synth_2.5E-12	NA	0.0487951	qPCRSC

## Sheet: LB_qPCR_synth_gene_dil
Location	Sample	Ct	Expected_stand_conc	PCR_ID
NTC	a	Undetermined		qPCRSC
NTC	a	Undetermined		qPCRSC
NTC	a	39.9		qPCRSC
NTC	a	39.29		qPCRSC
	_Synth_2.50E-04	19.16	4879513	qPCRSC
	_Synth_2.50E-04	18.98	4879513	qPCRSC
	_Synth_2.50E-04	19.31	4879513	qPCRSC
	_Synth_2.50E-04	19.47	4879513	qPCRSC
	_Synth_2.50E-04	19.2	4879513	qPCRSC
	_Synth_2.50E-04	19.32	4879513	qPCRSC
	_Synth_2.50E-04	18.94	4879513	qPCRSC
	_Synth_2.50E-04	19.34	4879513	qPCRSC
	_Synth_2.50E-04	19.2	4879513	qPCRSC
	_Synth_2.50E-04	19.62	4879513	qPCRSC
	_Synth_2.50E-05	23.25	487951	qPCRSC
	_Synth_2.50E-05	23.42	487951	qPCRSC
	_Synth_2.50E-05	23.18	487951	qPCRSC
	_Synth_2.50E-05	23.25	487951	qPCRSC
	_Synth_2.50E-05	23.29	487951	qPCRSC
	_Synth_2.50E-05	23.37	487951	qPCRSC
	_Synth_2.50E-05	23.03	487951	qPCRSC
	_Synth_2.50E-05	23.11	487951	qPCRSC
	_Synth_2.50E-05	22.98	487951	qPCRSC
	_Synth_2.50E-05	23.18	487951	qPCRSC
	_Synth_2.50E-06	26.21	48795.1	qPCRSC
	_Synth_2.50E-06	26.81	48795.1	qPCRSC
	_Synth_2.50E-06	26.34	48795.1	qPCRSC
	_Synth_2.50E-06	26.52	48795.1	qPCRSC
	_Synth_2.50E-06	26.22	48795.1	qPCRSC
	_Synth_2.50E-06	26.09	48795.1	qPCRSC
	_Synth_2.50E-06	26.46	48795.1	qPCRSC
	_Synth_2.50E-06	26.67	48795.1	qPCRSC
	_Synth_2.50E-06	26.11	48795.1	qPCRSC
	_Synth_2.50E-06	26.32	48795.1	qPCRSC
	_Synth_2.50E-07	30.47	4879.51	qPCRSC
	_Synth_2.50E-07	30.94	4879.51	qPCRSC
	_Synth_2.50E-07	30.5	4879.51	qPCRSC
	_Synth_2.50E-07	30.54	4879.51	qPCRSC
	_Synth_2.50E-07	30.27	4879.51	qPCRSC
	_Synth_2.50E-07	30.65	4879.51	qPCRSC
	_Synth_2.50E-07	30.3	4879.51	qPCRSC
	_Synth_2.50E-07	30.15	4879.51	qPCRSC
	_Synth_2.50E-07	30.44	4879.51	qPCRSC
	_Synth_2.50E-07	30.61	4879.51	qPCRSC
	_Synth_2.50E-08	34.07	487.951	qPCRSC
	_Synth_2.50E-08	34.06	487.951	qPCRSC
	_Synth_2.50E-08	34.23	487.951	qPCRSC
	_Synth_2.50E-08	34.33	487.951	qPCRSC
	_Synth_2.50E-08	34.1	487.951	qPCRSC
	_Synth_2.50E-08	34.01	487.951	qPCRSC
	_Synth_2.50E-08	34.05	487.951	qPCRSC
	_Synth_2.50E-08	34.12	487.951	qPCRSC
	_Synth_2.50E-08	34.03	487.951	qPCRSC
	_Synth_2.50E-08	34.4	487.951	qPCRSC
	_Synth_2.5E-09	38.42	48.7951	qPCRSC
	_Synth_2.5E-09	38.15	48.7951	qPCRSC
	_Synth_2.5E-09	37.38	48.7951	qPCRSC
	_Synth_2.5E-09	37.42	48.7951	qPCRSC
	_Synth_2.5E-09	37.78	48.7951	qPCRSC
	_Synth_2.5E-09	38.16	48.7951	qPCRSC
	_Synth_2.5E-09	37.57	48.7951	qPCRSC
	_Synth_2.5E-09	38.42	48.7951	qPCRSC
	_Synth_2.5E-09	37.3	48.7951	qPCRSC
	_Synth_2.5E-09	38.04	48.7951	qPCRSC

## Sheet: LB_dPCR_synth_gene_dil
Sample	SampleConc	EstConc	npositive	ntotal
2.5e-06	48795.1	1308.1	2659	7854
2.5e-06	48795.1	715.2	1631	8236
2.5e-06	48795.1	1247.6	2679	8159
2.5e-06	48795.1	1479.6	3124	8215
2.5e-06	48795.1	1431.6	3109	8112
2.5e-06	48795.1	1371.9	2863	7740
2.5e-06	48795.1	1155.3	2519	8216
2.5e-06	48795.1	1207.6	2583	8203
2.5e-06	48795.1	1428.9	2964	8221
2.5e-06	48795.1	1126.2	2382	8195
2.5e-07	4879.51	112.4	294	8250
2.5e-07	4879.51	98.39	268	8248
2.5e-07	4879.51	117.7	325	8258
2.5e-07	4879.51	106.7	291	8253
2.5e-07	4879.51	101.2	261	8272
2.5e-07	4879.51	70.56	179	8264
2.5e-07	4879.51	48.63	123	8267
2.5e-07	4879.51	77.54	192	8264
2.5e-07	4879.51	85.52	148	5754
2.5e-07	4879.51	77.92	201	8216
2.5e-08	487.951	16.59	46	8278
2.5e-08	487.951	10.04	26	8247
2.5e-08	487.951	6.492	17	8277
2.5e-08	487.951	6.314	16	8273
2.5e-08	487.951	7.544	19	8275
2.5e-08	487.951	9.37	23	8213
2.5e-08	487.951	5.44	13	7786
2.5e-08	487.951	18.14	47	8243
2.5e-08	487.951	12.32	34	8258
2.5e-08	487.951	10.75	29	8019
2.5e-09	48.7951	0.793	2	8275
2.5e-09	48.7951	0.789	2	8277
2.5e-09	48.7951	0.396	1	8276
2.5e-09	48.7951	0.399	1	8228
2.5e-09	48.7951	1.194	3	8249
2.5e-09	48.7951	1.524	4	8269
2.5e-09	48.7951	0.363	1	8263
2.5e-09	48.7951	1.103	3	8024
2.5e-09	48.7951	0.386	1	8197
2.5e-09	48.7951	1.191	3	8153
2.5e-10	4.87951	0.397	1	8256
2.5e-10	4.87951	0	0	8268
2.5e-10	4.87951	0	0	8263
2.5e-10	4.87951	0	0	8266
2.5e-10	4.87951	0.725	2	8229
2.5e-10	4.87951	0	0	8264
2.5e-10	4.87951	0	0	8255
2.5e-10	4.87951	0	0	7133
2.5e-10	4.87951	0.389	1	8235
2.5e-10	4.87951	0	0	8275
2.5e-11	0.487951	0.762	2	8250
2.5e-11	0.487951	0.354	1	8250
2.5e-11	0.487951	0	0	8252
2.5e-11	0.487951	0	0	8271
2.5e-11	0.487951	0	0	8264
2.5e-11	0.487951	0	0	8248
2.5e-11	0.487951	0	0	8250
2.5e-11	0.487951	0	0	8243
2.5e-11	0.487951	0	0	8254
2.5e-11	0.487951	0	0	8263
2.5e-12	0.0487951	0.703	2	8260
2.5e-12	0.0487951	0	0	7606
2.5e-12	0.0487951	0	0	8270
2.5e-12	0.0487951	0	0	8270
2.5e-12	0.0487951	0	0	8263
2.5e-12	0.0487951	0	0	8273
2.5e-12	0.0487951	0.377	1	8264
2.5e-12	0.0487951	0	0	8261
2.5e-12	0.0487951	0	0	6949
2.5e-12	0.0487951	4.291	10	6682

## Sheet: LB_ddPCR_synth_gene_dil95
Sample	SampleConc	EstConc	npositive	ntotal
2.5e-06	48795.1	661	7445	17324
2.5e-06	48795.1	701	6612	14736
2.5e-06	48795.1	636	5939	14216
2.5e-06	48795.1	823	8981	17841
2.5e-06	48795.1	753	6896	14590
2.5e-06	48795.1	704	6056	13451
2.5e-06	48795.1	572	5478	14219
2.5e-06	48795.1	205	2443	15268
2.5e-06	48795.1	186	2348	16074
2.5e-06	48795.1	185	2531	17372
2.5e-07	4879.51	95.8	115	1470
2.5e-07	4879.51	74.2	1084	17727
2.5e-07	4879.51	86.3	1158	16380
2.5e-07	4879.51	86.4	1210	17082
2.5e-07	4879.51	84.5	1200	17314
2.5e-07	4879.51	35.7	286	9581
2.5e-07	4879.51	73.7	1099	18090
2.5e-07	4879.51	68.4	1025	18139
2.5e-07	4879.51	85.7	1177	16759
2.5e-07	4879.51	86.6	1132	15959
2.5e-08	487.951	11.2	163	17188
2.5e-08	487.951	8.71	122	16548
2.5e-08	487.951	9.25	134	17104
2.5e-08	487.951	8.71	124	16816
2.5e-08	487.951	9.93	164	19505
2.5e-08	487.951	14	199	16814
2.5e-08	487.951	8.94	107	14136
2.5e-08	487.951	10.5	165	18646
2.5e-08	487.951	7.45	105	16639
2.5e-08	487.951	8.59	130	17877
2.5e-09	48.7951	0.857	11	15108
2.5e-09	48.7951	0.52	7	15829
2.5e-09	48.7951	1.54	22	16818
2.5e-09	48.7951	1.2	15	14707
2.5e-09	48.7951	8.07	115	16827
2.5e-09	48.7951	4.48	65	17092
2.5e-09	48.7951	0.719	10	16363
2.5e-09	48.7951	0.624	9	16974
2.5e-09	48.7951	0.948	13	16140
2.5e-09	48.7951	1.26	20	18739
2.5e-10	4.87951	0.264	4	17828
2.5e-10	4.87951	0.473	7	17407
2.5e-10	4.87951	2.88	39	15955
2.5e-10	4.87951	4.83	69	16858
2.5e-10	4.87951	0.138	2	17070
2.5e-10	4.87951	0.138	2	17059
2.5e-10	4.87951	0.368	5	15974
2.5e-10	4.87951	0.22	3	16015
2.5e-10	4.87951	0.283	4	16617
2.5e-10	4.87951	0.24	4	19636
2.5e-11	0.487951	0.463	7	17806
2.5e-11	0.487951	0.139	2	16964
2.5e-11	0.487951	0.2	3	17661
2.5e-11	0.487951	0.135	2	17433
2.5e-11	0.487951	0.064	1	18391
2.5e-11	0.487951	0.37	5	15898
2.5e-11	0.487951	0.251	2	9378
2.5e-11	0.487951	0.679	11	19067
2.5e-11	0.487951	1.22	16	15438
2.5e-11	0.487951	0.659	10	17850
2.5e-12	0.0487951	0.071	1	16574
2.5e-12	0.0487951	0.212	3	16635
2.5e-12	0.0487951	0.0721	1	16307
2.5e-12	0.0487951	0.607	8	15521
2.5e-12	0.0487951	0.0714	1	16472
2.5e-12	0.0487951	0	0	16580
2.5e-12	0.0487951	0.258	3	13700
2.5e-12	0.0487951	0.16	2	14698
2.5e-12	0.0487951	0.328	4	14336
2.5e-12	0.0487951	0.0827	1	14224
